# Stakeholders' views on an institutional dashboard with metrics for responsible research

**Authors\*:** Tamarinde Haven<sup>1</sup>, Martin Holst<sup>1,2</sup>, Daniel Strech<sup>1</sup>

**Author affiliations:**

<sup>1</sup> Berlin Institute of Health at Charité – Universitätsmedizin Berlin, QUEST Center, Charitéplatz 1, 10117 Berlin, Germany

<sup>2</sup> Medizinische Hochschule Hannover, Institut für Ethik, Geschichte und Philosophie der Medizin, Carl-Neuberg-Str. 1, 30625 Hannover, Germany

**Funding statement:** This work was funded by the German Federal Ministry of Education and Research (BMBF 01PW18012). The funder had no role in the study design, data collection and analysis, decision to publish, or preparation of the manuscript.

**Conflicts of Interests:** The authors build part of the QUEST Center that developed the dashboard and endorse the increased application of measures for robust and transparent science.

**Acknowledgements:** We would like to acknowledge Delwen Franzen, Nico Riedel, Benjamin Gregory Carlisle and Maia Salholz-Hillel for their work in designing the dashboard and feedback on the interview topic guide. We are grateful for the interviewee suggestions from Miriam Kip, Evgeny Bobrov, Simon Krupka, Sarah Weschke, Ulrich Dirnagl and Stephanie Müller-Ohlraun. We would also like to acknowledge Lena Woydack, Constance Holman and Tim Neumann for participating in the pilot interviews and helping us to refine our interview questions. Finally, we are thankful for all interviewees that gave us their time and their views.

## Abstract

*Background:* Concerns about research waste have fueled debate about incentivizing individual researchers and research institutions to conduct responsible research. Instead of looking at impact factors or grants, research institutions should be assessed based on indicators that pertain to responsible research. In this study, we showed stakeholders a proof-of-principle dashboard with quantitative metrics that visualized responsible research performance on a German University Medical Center (UMC) level. Our research question was: What are stakeholders' views on a dashboard that displays the adoption of responsible research practices on a UMC-level?

*Methods:* We recruited different stakeholders to participate in an online interview. Stakeholders included UMC leadership, support staff, funders, and experts in responsible research. We asked interviewees to reflect on the strengths and weaknesses of this institutional dashboard approach and enquired their perceptions of the metrics it included. The interviews were recorded and transcribed. We applied content analysis to understand what stakeholders considered the Strengths, Weaknesses, Opportunities, and Threats of the dashboard and its metrics.

*Results:* We interviewed 28 international stakeholders (60% German). Overall, interviewees thought the dashboard was helpful in seeing where an institution stands and appreciated the fact that the metrics were based on concrete behaviors. Main weaknesses included the lack of a narrative explaining the choice of the metrics covered. Interviewees considered the dashboard a good opportunity to initiate change and hoped the dashboard could be supplemented with other indicators in the future. They feared that making the dashboard public might risk incorrect interpretation of the metrics and put UMCs in a bad light.

*Discussion:* While the feedback was given specifically to our proof-of-principle dashboard, our findings indicate that discussion with stakeholders is needed to develop an overarching framework governing responsible research on an institutional level, and to involve research-performing organizations.

*Keywords:* responsible research, university medical center, dashboard, Open Science, robustness, transparency

## **Introduction**

Concerns about research waste have fueled debate about incentivizing individual researchers and research performing organizations to conduct responsible research (Macleod et al., 2014). One key point was that individual and institutional research performance should be assessed differently ('DORA', 2013; Hicks et al, 2015; Ioannidis, 2014). Rather than looking at high impact publications or grants obtained, one should focus on indicators that pertain to responsible conduct of research (Higgison & Munafò, 2016; Moher et al., 2018; Moher et al., 2020). This holds true for individual researchers of all career stages (Flier, 2017), as well as for research performing organizations, that can themselves be subject to dysfunctional incentives (Anderson, 2019; Baglioli et al., 2019).

Research performing organizations, in our case, University Medical Centers (UMCs), play a key role in fostering responsible research (Begley et al., 2015; Strehl et al., 2020; Bouter, 2020). They can put out relevant policies (e.g., for data sharing), provide critical infrastructure (e.g., for coordinating clinical trials), and reward responsible research more generally (Rice et al., 2020). But this requires awareness about responsible research on an institutional level, and commitment from UMCs to make this a priority (Bouter, 2018; Forsberg et al., 2018).

In this study, we showed stakeholders a proof-of-principle dashboard with quantitative metrics that visualized responsible research performance on a UMC level (e.g., for a given UMC, what percentage of its trials is prospectively registered?). The metrics included pertained to responsible research practices such as registration and reporting of clinical trials (inspired by work from Goldacre et al., 2018; Wieschowski et al., 2019), robustness in animal research (e.g., randomization and blinding, see Macleod & Mohan, 2019), and Open Science (including Open Access, Data, and Code, see Serghiou et al., 2021). Our research question was: What are stakeholders' views on a dashboard that displays the adoption of responsible research practices on a UMC-level?

## **Methods**

### ***Ethical approval***

The ethical review board of the Charité – Universitätsmedizin Berlin reviewed and approved our research protocol and materials (#EA1/061/21).

### ***Participants***

When discussing the adoption of responsible research practices on an institutional (UMC) level, we distinguish four broad stakeholder groups: 1) UMC leadership (e.g., deans, heads of strategy, heads of pan-UMC organizations), 2) support staff (e.g., policy makers, librarians, heads of core facilities (including 3R centers and clinical research units)), 3) research funders, and 4) experts in responsible research assessment. Participants were recruited through our own networks, snowballing, or through internet searches (cold calling). We used purposive sampling, combined with snowballing (i.e., following up on potential stakeholders suggested by interviewees) and invited a total of 49 potential participants.

### ***Procedure***

Participants first received an invitational e-mail with a link to the information letter, informed consent form, and protocol (see appendix 1). We sent one reminder a week after. When participants agreed to participate, we scheduled an appointment for an online interview through Microsoft Teams. Participants received a link to the dashboard and a tutorial explaining the dashboard (see [here](#) and appendix 2). They signed the informed consent form prior to the interview.

We conducted the interviews online between April and June 2021. Interviews lasted between 30 and 50 minutes. One team member led the interview (TH (Dr), MH (PhD candidate) or DS (Prof), who are all trained in qualitative research methods), whilst another team member observed and made notes on the interview's process and its content. After a brief introduction of the interviewer and the interviewee, interviews were conducted using a topic guide (semi-structured) that was based on a literature review and various internal discussions (see appendix 3). The topic guide was pilot tested ( $n = 3$ ) for comprehensibility using cognitive interviewing (Beatty & Willis, 2007). After each interview, the team got together for reflection (peer-debriefing). If they wanted, interviewees received a brief written summary of the interview (member check) with the option to comment or correct. The interviews were transcribed by a transcription company under a data processing agreement. We used the COREQ checklist to write up our findings (Tong et al., 2007). For a more elaborate description of our procedure, see study protocol (<https://osf.io/z7bsq/>).

### **Data analysis**

We applied content analysis that involved deductive and inductive elements (Elo & Kyngäs, 2008). We structured stakeholders' views by looking for Strengths, Weaknesses, Opportunities, and Threats (SWOTs), see Table 1. Subcodes within each part of the SWOT were derived from the data. These subcodes pertain to the general approach of an institutional dashboard and responsible metrics, i.e., suggestions for improvement by interviewees that were specific to the proof-of-principle version are not featured in the results where they have been implemented successfully (e.g., the dashboard interviewees saw displayed a sample of publications, the final dashboard that will be published shortly includes all publications).

**Table 1.** SWOT definitions

|                      |                                                                                                                                                                                                                                                                                                         |
|----------------------|---------------------------------------------------------------------------------------------------------------------------------------------------------------------------------------------------------------------------------------------------------------------------------------------------------|
| <b>Strengths</b>     | Characteristics inherent to the current dashboard approach or the metrics included that are considered valuable for visualizing institutional performance in terms of responsible research                                                                                                              |
| <b>Weaknesses</b>    | Characteristics inherent to the current approach that could be considered disadvantages, areas that need improvement for the dashboard and that are within the realm of the internal environment                                                                                                        |
| <b>Opportunities</b> | Potential use cases of the dashboard that could increase its chances of successful uptake, as well as additions to the approach or the metrics that – when implemented – would improve the chances of stakeholder wide-uptake of visualizing institutional performance in terms of responsible research |
| <b>Threats</b>       | Characteristics in the external environment that could undermine implementation of the dashboard approach or others measures to visualize institutional performance in terms of responsible research                                                                                                    |

Our analysis consisted of three phases. First, two team members (TH and MH) read and coded 5 interviews independently using MAXQDA 2020 (Release 20.3.0, VERBI GmbH, Germany). They then each proposed a code tree, exchanged these, and resolved discrepancies through discussion. With this revised code tree, the two team members coded another 5 interviews. This process was repeated until saturation was established (Fusch & Ness, 2015). The code tree that resulted was then presented to the full research team (together with the interviews). Reviewing the final interviews resulted in minor modifications to the wording of the code tree only (appendix 4), which formed the basis of our results.

## Results

### *Demographics*

We invited a total of 49 stakeholders, 28 of them agreed to an interview (response rate: 57%, one interview was conducted with two participants). From these 28 stakeholders, 89% came from our own networks or the networks of our collaborators, and 11% were suggested through snowballing. The demographics of our interviewees appear in Table 2.

**Table 2.** Demographics of interview participants

| <b>Stakeholder group</b>                                                         | <b>#</b> |
|----------------------------------------------------------------------------------|----------|
| <i>UMC leadership</i>                                                            | 4        |
| <i>Support staff (including librarians, policy makers, CRU staff, 3Rs staff)</i> | 14       |
| <i>Funders</i>                                                                   | 5        |
| <i>Responsible research experts</i>                                              | 5        |
| <b>Gender</b>                                                                    |          |
| <i>Male</i>                                                                      | 22       |
| <i>Female</i>                                                                    | 6        |
| <b>Nationality</b>                                                               |          |
| <i>Germany*</i>                                                                  | 17       |
| <i>Europe (besides Germany)</i>                                                  | 10       |
| <i>North America</i>                                                             | 1        |
| <b>Total</b>                                                                     | 28       |

\* One interview was conducted in German.

Below we describe the most important SWOTs according to our interviewees. We identified 3 strengths, 3 main weaknesses, 6 opportunities, and 4 main threats, see Figure 1. Each subtheme is illustrated with quotes, see Table 3.

**Figure 1.** Overview of SWOTs regarding institutional dashboards with metrics for responsible research

It is made available under a [CC-BY 4.0 International license](https://creativecommons.org/licenses/by/4.0/) .

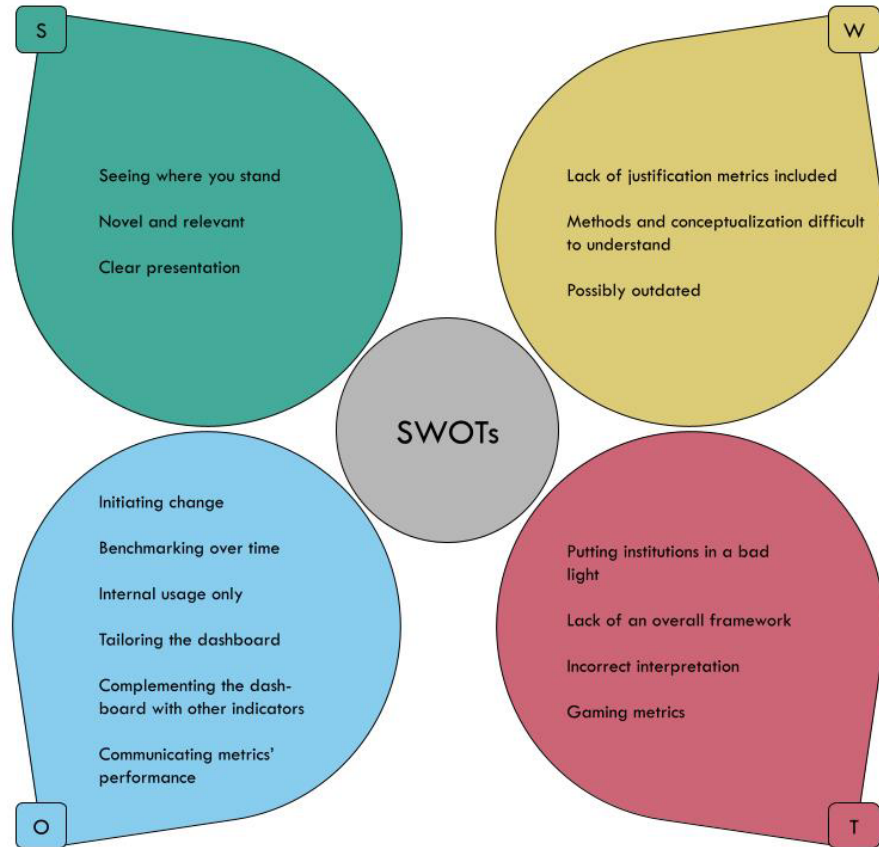

**Table 3.** Illustrative quotes per theme.

| <b>SWOT category</b>                                  | <b>#</b> | <b>Illustrative quotations</b>                                                                                                                                                                                                                                                                                                                                                                                                                                                                                                                                                      |
|-------------------------------------------------------|----------|-------------------------------------------------------------------------------------------------------------------------------------------------------------------------------------------------------------------------------------------------------------------------------------------------------------------------------------------------------------------------------------------------------------------------------------------------------------------------------------------------------------------------------------------------------------------------------------|
| <b>Strengths</b>                                      |          |                                                                                                                                                                                                                                                                                                                                                                                                                                                                                                                                                                                     |
| Seeing where you stand                                | 1        | “You need to be a little tough, to be honest to yourself and see where you stand. It might be uncomfortable at the beginning when you think, “all right, we are the [UMC], we are the best, the nicest and the greatest.” (Interviewee 19 – Support staff 3R)                                                                                                                                                                                                                                                                                                                       |
|                                                       | 2        | “You can't change unless you know what your baseline is.” (Interviewee 4 – Responsible Research expert)                                                                                                                                                                                                                                                                                                                                                                                                                                                                             |
|                                                       | 3        | “If we as a funder ask for these things, are we actually in line with the strategy of the institution we are planning to fund, or is this really something we would be imposing, or is this something we are behind? It's really hard to tell how far the institutions are, because in applications, they will always tell you, “Everything is fine. We have this policy, blah blah blah.” But to actually see the numbers really helps. And this, I find really interesting.” Interviewee 13 – funder)                                                                             |
| Novel and relevant                                    | 4        | “Some reviewers maybe don't take the time for it or they look for the h-factor or the impact factor, sorry, by themselves even though you don't want them to do. This is really a problem and this is why I think we don't really do this at the moment but I think it could be very interesting to have alternative parameters, not only say look into the papers by yourself, but we have indicators like randomization, blinding, and power calculation for the reviewers.” (Interviewee 14 – funder)                                                                            |
|                                                       | 5        | “It's a positive view. I'm feeling very positive about this because it demonstrates the value of openness and also the meaning of openness and scholarly communication. I think it makes researchers, but also administrators, aware that open access and open science practices matter and that techniques are available to monitoring the progress of these open access and open science practices.” (Interviewee 24 – Responsible research expert)                                                                                                                               |
| Clear presentation                                    | 6        | “I like the simplicity of the dashboard, so that you have these indicators and that the context is given when you hover over these information or warning signs with limitations. I really, really like the limitations button so that people know how to interpret the data. So, there's a nice balance between simplicity and context. I also like the fact that there is the percentage and the absolute number because often, yes, one of the two is given” (Interviewee 22 – librarian and Open Science expert)                                                                |
|                                                       | 7        | “The idea of the dashboard obviously seems to be that you have a quick overview and I don't have to go into many details there but that was my idea of a dashboard and in terms of that I think it's quite helpful.” (Interviewee 20 – UMC leadership)                                                                                                                                                                                                                                                                                                                              |
| <b>Weaknesses</b>                                     |          |                                                                                                                                                                                                                                                                                                                                                                                                                                                                                                                                                                                     |
| Lack of justification for metrics included            | 8        | “I don't see a conceptual scheme behind it yet. So, what do you want to measure? You seem to jump immediately to what you can measure. That is one of the things I was missing, jumping immediately in the doable, and I didn't see the analysis of what you ideally would want to do. [...] That type of reasoning, I was missing. It was jumping to what can be automated, jumping to what is available, jumping to what was out, that not that many effort can be made graphs of.” (Interviewee 7 – Responsible research expert)                                                 |
| Methods and conceptualization difficult to understand | 9        | “Then, I would also have, when I would be a dean of a UMC, I also should be able to defend the whole thing, to be realistic, because you're running a shop of researchers. They immediately start criticizing the methodology behind the whole thing. So the methodology should be completely transparent. Well, it will never be excellent, but it should be acceptable, and good enough for purpose. Fit for purpose. I should be able to defend that fiercely, because I need to defend that, as a leader of such an institution.” (Interviewee 7 – Responsible research expert) |
|                                                       | 10       | “Then listed are three measures against the risks of bias, like randomization, blinding, sample size calculation. They are important measures. I agree, but I don't think that are comprehensive enough to qualify as indicators of robustness, it needs more than that, I think.” (Interviewee 28 – Support staff; Animal research expert)                                                                                                                                                                                                                                         |
| Possibly outdated                                     | 11       | “You see the open access dashboards and you see it over time, you know, but 2018 is nice, but first of all, I would challenge you to make dashboards as accurate as possible because open access is moving so rapidly that 2018, yes well, if there is one big Springer deal in place after 2018 or Elsevier deal in place after that, or there's no deal, then the numbers drop or improve so that's my first point make it as accurate as possible.” (Interviewee 1 – Librarian and Open Access expert)                                                                           |
| <b>Opportunities</b>                                  |          |                                                                                                                                                                                                                                                                                                                                                                                                                                                                                                                                                                                     |
| Initiating change                                     | 12       | “If you're looking at it like if you want to improve open science and robust research,                                                                                                                                                                                                                                                                                                                                                                                                                                                                                              |

It is made available under a [CC-BY 4.0 International license](https://creativecommons.org/licenses/by/4.0/) .

- then it's a good thing because if you see the average and you see that your own institution is below average, then that gives you an indication that something should be done or it gives you an idea that maybe you should ask questions, why my institution is below average. And that's good. Then you can start to talk to people and do something about it, try to find reasons for this" (Interviewee 12 – Librarian and Open Science expert)
- 13 "So they become a regular, because they are so aggregated and so information-rich, they should be on that level and really a general part of the discussion on a regular theme, because this could also foster the discussion in this area." (Interviewee 26 – science management and strategy)
- 14 "I think that is some part of also a culture so if the culture is that matching with your peers stimulates improvements, then this is the way this is important, then a Manager of a Senior Manager of a research institute can say, well, why don't we perform as well as that institute?" (Interviewee 1 – Librarian and OA expert)
- Benchmarking over time 15 "Because looking at what happens over time within a center, that to me is probably the most informative of this whole thing. I'm not so keen on ranking UMCs. I'm not so keen on doing races between institutions, that is rather trivial. What you want is their progress in the right direction. You want to be able to pick that up, and that you should do on center level and on indicator level." (Interviewee 7 – Responsible Research expert)
- 16 "Where I'm currently is like an absolute information that doesn't give me much discussion points. So it would be helpful for me if I could decide, what to change over time, and maybe if I, as a board member, had made a decision two years ago and then I would like to see what changes." (Interviewee 26 – science management and strategy)
- Internal usage only 17 "So for me, the strength really lay in considering this, for example, as an instrument of self-analysis. That is, if it remains at the level and is not linked to "I'll show this at the next review and then my bar will be higher than that of the others", but if it is a kind of internal process analysis or an integrated part of an internal process analysis." (Interviewee 8 & 9 – funder)
- 18 "The question is, the moment you go public, we have the blaming issue and then the press comes in and then it's hard to get better. So it's not a question of "do we have a benchmark"? It's a question of at least the first two or three years, can we keep the data in a protected space where people from different institutions can deal with it very open minded and discuss why they think the differences are there." (Interviewee 23 – UMC leadership)
- Tailoring the dashboard 19 "Some institutions may be particularly interested in certain things and others may be interested in very different things. But I think we need to get them to talk about other, a handful or three core practices that we could work on across the board." (Interviewee 4 – Responsible Research expert)
- 20 "I think not only in the medical sciences but especially there because it's so it's a very broad field. And I know I know it from the discussion about the impact factors that are very heterogeneous with regard to the disciplines. Whether we have a very, let's say, visible discipline, like, I don't know, cardiology or something, and then you have like the small disciplines, like ophthalmology. It's very small disciplines and with I think very strong effects on the impact factors. So this could be interesting when looking at your robustness indicators to have a differentiation by the disciplines." (Interviewee 14 – funder)
- Complementing the dashboard with other indicators 21 "An indicator that I missed actually was, whether there's a pre-print or not. PubMed Central. We invested a lot the last two years to link pre-prints with the accepted version and the journal, and this could be really of added value. Also to demonstrate to researchers and decision makers that, pre-printing can matter and can lead to quality-assured publications." (Interviewee 24 – librarian and Open Science expert)
- 22 "I think for transparency, you have also to be clear where are conflicts of interest?" (Interviewee 15 – funder)
- 23 "The problem is to not focus only on those things that are easily measured, like open data, number of publications, but also like the more soft "how" things. And they can be expressed also. Like inclusiveness and diversity can be expressed extremely easily in this way. I tell you, that will be scary for <UMC>." (Interviewee 10 – Responsible Research Expert)
- 24 "You could ask whether stakeholder or patient advocacy groups, for example, were involved in a trial design and preparation of the trial, and perhaps trial conduct or so. But as I said, the patient perspective on how patients who were in a given trial, how they viewed the overall conduct of the trial, I think is another aspect that might be valuable at some stage." (Interviewee 27 – UMC leadership)
- Communication of metrics' performance 25 "[A]s a methodologist maybe, you need to show me what is the validity and the precision of the whole game. Validity in terms of sensitivity, specificity, predictive



It is made available under a [CC-BY 4.0 International license](https://creativecommons.org/licenses/by/4.0/) .

|                                     |    |                                                                                                                                                                                                                                                                                                                                                                                                                                                                                                                                                                                                                                                                                                                                                                                            |
|-------------------------------------|----|--------------------------------------------------------------------------------------------------------------------------------------------------------------------------------------------------------------------------------------------------------------------------------------------------------------------------------------------------------------------------------------------------------------------------------------------------------------------------------------------------------------------------------------------------------------------------------------------------------------------------------------------------------------------------------------------------------------------------------------------------------------------------------------------|
|                                     |    | values, what have you, and precision in terms of test sample and confidence intervals, and whatever. There is no confidence interval in all these neat graphs, which is worrying, because you seem to suggest that there are differences, and I'm not convinced. You might only be looking at random fluctuation" (Interviewee 7 – Responsible Research expert)                                                                                                                                                                                                                                                                                                                                                                                                                            |
|                                     | 26 | "I think the metrics that you have are fine, but I'm not sure if they are accurate. So it depends on the quality of the data you use to produce the dashboard. So I can't tell what the quality of your data input is. You should make sure that the data you show are reliable" (Interviewee 12 –Responsible Research expert)                                                                                                                                                                                                                                                                                                                                                                                                                                                             |
|                                     | 27 | "I started to look at some of the papers that you linked and some of the papers report performance metrics, but I would love to see it directly in the dashboard, some hints to how much can I trust the algorithm? And one thing that would be really great, I'm not sure how it could work, but if you could add something like error bars that doesn't fall out of the algorithm directly. So I think they don't provide like an uncertainty rating of the estimates, but something like that would be great. So, like, it's open, sharing data somewhere between five and 50 percent. And then I can see, okay, that's the error range of the algorithm. I don't know if it works, but it would be nice to decrease the illusion of certainty." (Interviewee 21 – Open Science expert) |
| <hr/>                               |    |                                                                                                                                                                                                                                                                                                                                                                                                                                                                                                                                                                                                                                                                                                                                                                                            |
| <b>Threats</b>                      |    |                                                                                                                                                                                                                                                                                                                                                                                                                                                                                                                                                                                                                                                                                                                                                                                            |
| Putting institutions in a bad light | 28 | "[I]t's not really important what others do, we try to achieve 100 percent, that's not easy, but we would be working on this now. For us, it's important to set goals from the beginning and to achieve those goals. Yes, it's always the wrong way to get bad press and then you investigate, what's the reason for that? And then you gain goals from the bad press. The better thing is to set from the beginning, what are our goals despite of all others and of the press and them to achieve this?" (Interviewee 16 – clinical trials expert)                                                                                                                                                                                                                                       |
|                                     | 29 | "I think people worry that this information will be used to point fingers in a negative way. And I think we as a community must work very, very hard, collaboratively with the end users to improve the situation." (Interviewee 4 – Responsible research expert)                                                                                                                                                                                                                                                                                                                                                                                                                                                                                                                          |
| Lack of an overall framework        | 30 | "There is a critical point that came into my mind, and that is the question, who says which and who gives the standard? So, who says that these metrics are the right ones? And who says that the way they were calculated are correct? So, there must be a really good justification that these metrics are correct and they should be something like a general agreement." (Interviewee 19 – Animal research expert)                                                                                                                                                                                                                                                                                                                                                                     |
| Incorrect interpretation            | 31 | "[T]his is a very tricky part because, once a civil servant of a university that I worked for said, "Please keep in mind that you can make a very nice report with an executive summary, but these people, these policymakers, they are like children. They read comic books. So they only look at your tables and graphs, and everything else, the text, is simply overseen, overlooked or forgotten." So you can put a lot of effort in writing down extensive sections with limitations, but not so many people will read these, which is, of course, stupid. I realize that and I'm aware of that. But what can you do about it?" (Interviewee 6 – Open Science expert)                                                                                                                |
|                                     | 32 | "I think I do, but in the conversations that we've had with university leadership, we noticed that a lot of people don't. They just look at the figures and say, "oh, okay", they take it at face value. And don't really appreciate the limitations that are there." (Interviewee 5 – Librarian)                                                                                                                                                                                                                                                                                                                                                                                                                                                                                          |
| Gaming metrics                      | 33 | "There we are again at the end with 'Goodhart's Law'. If at some point this becomes a measure that is perhaps linked to success in acquiring third-party funding, then everyone will end up writing in: 'I share my data with ...' How reliable this is then the second level? But these numbers can increase rapidly if you only link them to an output link at the end. In this respect, it may seem objective now, but in the end it is no longer objective when you put it in front of the cart." (Interviewee 8 & 9 – funder)                                                                                                                                                                                                                                                         |
|                                     | 34 | "I think that all the potential dangers of a dashboard are always that the metrics are going to be taken as a goal and perhaps also that it's going to be seen more as a leader board than as a way to help people move forward." (Interviewee 3 – librarian)                                                                                                                                                                                                                                                                                                                                                                                                                                                                                                                              |

## Strengths

### *Seeing where you stand*

Overall, interviewees were pleased to see that the dashboard focused on specific measures that relate to concrete behaviors. Many interviewees thought the dashboard was helpful in showing institutions where they stand when it comes to responsible research practices. The dashboard approach allowed for creating a baseline, which was considered

essential before talking about change or improvement on the metrics. Some expressed curiosity about the extent to which the dashboard would match internal data on self-evaluation processes.

#### *Novel and relevant*

Various interviewees indicated this was the first time they saw such a dashboard. They thought it fulfilled an important need and some interviewees felt these measures could serve as an alternative to publication output, journal impact factors, third-party funding, or other widespread metrics of institutional performance. Many interviewees considered the included topics timely, as they related to ongoing discussions in the field regarding responsible research and contemporary science policy.

#### *Clear presentation*

Many interviewees indicated they appreciated the transparent overview. They liked the interactive features of the dashboard (e.g., switching between percentages and absolute numbers, hover-over fields with limitations) and appreciated the fact that it gave them a good overview whilst not overburdening the viewer with information.

### **Weaknesses**

#### *Lack of justification for metrics included*

Several participants indicated that they missed an overall narrative that would justify the choice of metrics included. In addition, it was unclear to some interviewees how the metrics related to each other, or to the quality of research. This made it hard for participants to understand the purpose of the dashboard. By presenting these metrics, it seemed as if these metrics were the standard metrics for institutional assessment, and various participants indicated that they did not consider that accurate.

#### *Methods and conceptualization difficult to understand*

Several interviewees expressed difficulty in interpreting the methods by which the metrics were compiled and the limitations inherent to these methods. This included the fact that the metrics may change over time, e.g., the numbers for Green Open Access might change once more publications are made available. Various participants stressed that the way particular metrics were operationalized was unclear. Finally, participants found it difficult to understand the metrics' denominators, indicating it was unclear whether all metrics pertained to the same dataset or to different (parts of the) dataset(s), and whether the dashboard used all relevant available data sources (e.g., all eligible study registries), to provide a less biased measurement.

#### *Possibly outdated*

Some participants were concerned that metrics on robustness of animal research or Open Science stemming from publications in 2018 would present an outdated picture. They pointed to various developments in those areas in recent years and interviewees expected that publications from 2019 and 2021 would show higher robustness and Open Science scores. Although the fact that the data were taken from 2018 was a feature of the proof-of-principle dashboard, interviewees' concerns underscore the need to continuously integrate new information into the dashboard, ideally in an automated manner.

## **Opportunities**

### *Initiating change*

The dashboard was considered a good tool to start an evidence-based conversation on how to improve responsible research practices and about a more holistic evaluation of research institutions, i.e., assessing different institutional facets and not merely citations or impact factors. Some interviewees remarked that the dashboard could provide more information about how one could induce change, and aid in the development of concrete interventions. The dashboard would then, in their view, need to be presented to organizational leadership on a regular basis to fuel a discussion about efforts to improve. In addition, participants thought the dashboard could promote collective improvement efforts (or ‘healthy competition’) that would enable institutions to learn from each other.

### *Benchmarking over time*

Several interviewees stressed that the dashboard should include the possibility to benchmark oneself over time. Whereas this was possible for some indicators, many interviewees believed that having this data over time for all metrics could help institutions to evaluate whether interventions to improve their performance on particular metrics were successful.

### *Internal usage only*

When thinking about how to prevent possible detrimental consequences of benchmarking, many interviewees stressed that it would be most responsible if the dashboard would be used for internal purposes only. The dashboard’s information would not be accessible to anyone outside the institution, except if the institutional leadership chose to publicize some information. Some interviewees suggested that the dashboard should go public with a 2- or 3-year delay, which would give institutions the opportunity to improve first.

### *Tailoring the dashboard*

Another opportunity that various interviewees raised was tailoring the dashboard to the institutional strategy. This would mean that different institutions would have different dashboards with different metrics, allowing institutions to create focus areas for a specific timeframe (e.g., in 3 years’ time, at least 60% of our publications should have open data). Related to this, some interviewees remarked that it would be helpful to link to more fine-grained levels of information, e.g., on a particular center within the research institution or a research field level. They remarked that they would appreciate the opportunity to correct or at least comment on the numbers (e.g., providing a reason why an institution performs badly on trial reporting), or to withdraw from the dashboard.

### *Complementing the dashboard with other indicators*

Various interviewees discussed additional metrics they thought might be included the dashboard. Two of the most often mentioned suggestions were preprints and conflict of interest statements. Interviewees involved in clinical trials thought a metric on the overall number of clinical trials conducted could provide useful context. They also suggested metrics related to patient engagement in clinical research. In relation to animal research, some interviewees thought a metric for preregistration of animal studies could be useful, while others mentioned the choice of the model system as an important metric for the generalizability and translation of research. More broadly speaking, various interviewees

mentioned metrics related to diversity, such as the percentage of female researchers or female principal investigators at a particular institution, or metrics related to the societal value of research, such as uptake of research by the media, policy documents, clinical guidelines, or patents.

#### *Communicating metrics' performance*

Different interviewees remarked that they missed statistics on metrics' performance. They would like to see uncertainty indicators such as confidence intervals, so that they could assess when an institute would perform better or worse than all institutions together. They also asked for numbers on the sensitivity and specificity of the sampling and classification approaches.

#### **Threats**

##### *Putting institutions in a bad light*

Many interviewees feared that making the dashboard public in its current form would put institutions in a bad light. Whereas they thought some form of benchmarking could be helpful, they worried that the dashboard could be used as a tool to name and shame institutions, which could in turn have detrimental consequences for funding or for an institution's reputation among the public. Some interviewees also mentioned that institutions should not be blamed for not meeting a metric's requirement in the absence of sufficient infrastructure in place (e.g., a data sharing platform) that would allow institutions to comply. A few interviewees also pointed out that there is no inherent need for a comparison, since it is already self-evident that institutions should do their best to score high on these metrics.

##### *Lack of an overall framework*

Some participants pointed out that the metrics seemed normative but were not backed by an overall legal or regulatory framework. This made participants question who decides what good metrics for responsible research are. Without such a consented framework, participants feared that the dashboard would not be accepted as a viable complementary or alternative approach to evaluate research institutions.

##### *Incorrect interpretation*

Various interviewees were concerned that that the metrics would be misinterpreted, whether intentionally or unintentionally. Especially under precious time, stakeholders might not appreciate the metrics' limitations and instead take them at face value. This might result in inflating minor differences and risk the resource-heavy implementation of policies based on little understanding of the metrics. Additionally, some interviewees wondered whether other German UMCs were the right comparator, as there are large differences between the institutions.

##### *Gaming metrics*

Finally, various interviewees thought that the dashboard and the indicators therein could be gamed. Researchers at the respective institutions might feel that they must score high on these metrics and might get creative in the ways to score high, without living up to the ideals included in the respective metrics. More generally, some interviewees felt that boiling down these important issues to numeric indicators was not without risks.

## Discussion

We enquired stakeholders' views on a dashboard that displayed the adoption of responsible research practices on a UMC-level. Overall, interviewees were positive about the dashboard approach, indicating that it allowed them to “talk reality”. Various interviewees missed a justification for why these specific metrics and no other potentially relevant metrics for responsible research were included. Some interviewees expressed difficulty in understanding how the metrics were derived from the data. Different interviewees believed the dashboard could be instrumental in sparking behavioral change on an institutional level and hoped the dashboard would include more diverse metrics in the future. The main fear among interviewees was that making the dashboard public would risk metrics being taken at face value and could put UMCs in a bad light.

### **Contextualization**

#### *Overarching frameworks*

Various interviewees talked about missing an overall framework to fit this dashboard. There is a variety of frameworks available that are all applicable to the topic of responsible research practices. Broad examples include the TOP guidelines (Nosek et al., 2015) that include, beyond data and code transparency, study preregistration and openness about materials, and focus on what journals incentivize. Another broad example, this time focused on individual researchers, are the Hong Kong Principles (Moher et al., 2020), where explicit attention is paid to peer review and, more recently, diversity (Moher et al., 2021). More specific frameworks include ARRIVE for animal research (Kilkenny et al., 2010), or the Cochrane Risk of Bias tool for clinical trials (Higgins et al., 2011).

Some of our metrics find their origin in regulatory frameworks, such as the mandated registration of drug trials in EudraCT (European Commission, 2012). In addition, the World Health Organization has specified that results of clinical trials should be published in a relevant journal within two years of trial completion (WHO, 2015; 2017). The Declaration of Helsinki (World Medical Association, 2013) calls for all research involving human subjects to be prospectively registered and published.

That said, no framework for responsible research seems broad enough or has received universal or consented support. It is questionable whether such a framework will be developed, and it raises the question of who should oversee its development. A potential candidate would be the UNESCO recommendations of Open Science (UNESCO, 2021). An alternative approach could be involving a group of UMCs in a consensus-building procedure to find a set of indicators for responsible research that UMCs agree upon (see Cobey et al., 2021).

#### *Not making public data public*

Several interviewees were skeptical of making the dashboard public and allowing everyone to see how UMCs were doing in terms of responsible research compared to the average, or even compared to each other. This is interesting, as the data that the metrics are based on comes from public databases (e.g., clinicaltrials.gov or PubMed), and most of the tools used to create the metrics are publicly available as well. What then is the ideal level of openness or publicness of this information? We are presented with the dilemma that disclosing the dashboard to a select group of institutional leadership would be safer but would risk that nothing happens. Making the dashboard public would be more likely to spark

discussion but could harm the reputation of some institutes. The sensitivity of the topic underscores the need to collaborate closely with the respective research performing organizations when implementing a dashboard for responsible research.

#### *Dashboards for institutions*

We witnessed a surge in dashboards for responsible research and related topics in recent years. Some have a broad focus, such as the European Commission Open Science Monitor or the French Open Science Monitor that display broad disciplinary fields (Jeangirard, 2019; European Union, 2021). Others focused on (and ranked) individual researchers in terms of transparency, such as the Curate Science Transparency leaderboard (Curate Science, 2021). Some of our interviewees questioned whether an entire UMC is the right level for developing such a dashboard. It is interesting in this context that the DFG's revision of the Guidelines for Safeguarding Good Research Practice (DFG, 2019) includes explicit chapters on responsibilities for heads of research organizations. We believe that a dashboard approach could support heads of research organizations to empirically monitor the implementation of the revised code of conduct.

#### **Strengths and weaknesses of the study**

This is the first comprehensive map of stakeholders' views on a dashboard that visualizes UMC performance using metrics for responsible research. We interviewed both stakeholders within the German biomedical research landscape that are familiar with existing UMC incentives, as well as those that worked at universities outside Germany who could provide an international perspective.

There are some limitations to acknowledge. First, the stimulus we used regarded a proof-of-principle dashboard and therefore some SWOTs may be specific to our dashboard and less generalizable. We tried to mitigate this by using interviewees' feedback on our dashboard to highlight broader issues, such as the lack of an overall consented framework governing responsible research on an institutional level.

Second, stakeholders who are generally skeptical of the idea to evaluate UMCs differently might decline the invitation to participate in a study like ours. Although some stakeholders were very critical, the views presented in this paper might be rosier than the average stakeholder. We tried to invite stakeholders from outside our network, especially German UMC leadership ( $n = 15$ ), but despite various reminders, they were not willing to participate or did not reply.

#### **Conclusion**

We described what stakeholders considered the strengths, weaknesses, opportunities, and threats of a dashboard displaying the adoption of responsible research practices on an institutional level. Stakeholders appreciated the focus on behaviors that allowed them to see where a UMC stands but pointed to the lack of a justification for the metrics included. They feared institutions might be put in a bad light, underscoring the need for close collaboration with research institutions when implementing alternative approaches to evaluate research institutions.

#### **References**

Anderson, M. S. (2019). Shifting perspectives on research integrity. *Journal of Empirical Research on Human Research Ethics*, 13, 459–460.

Bagioli, M., Kenney, M., Martin, B. R., & Walsh, J. P. (2019). Academic misconduct, misrepresentation and gaming: A reassessment. *Research Policy*, 48, 401–413.

Begley, C. G., Buchan, A. M., & Dirnagl, U. (2015). Robust research: Institutions must do their part for reproducibility. *Nature*, 525(7567), 25–27. <https://doi.org/10.1038/525025a>

Beatty, P. C., & Willis, G. B. (2007). Research synthesis: The practice of cognitive interviewing. *Public opinion quarterly*, 71(2), 287-311.

Bouter, L. M. (2018). Fostering responsible research practices is a shared responsibility of multiple stakeholders. *Journal of Clinical Epidemiology*, 96, 143–146.

Bouter, L. (2020). What Research Institutions Can Do to Foster Research Integrity. *Sci Eng Ethics* 26, 2363–2369. <https://doi.org/10.1007/s11948-020-00178-5>

Cobey, K. et al (2021). Open Science Dashboard, Project page: DOI 10.17605/OSF.IO/JM8WG (last visited: September 13, 2021).

Curate Science. Transparency Leaderboard. (Pilot Project) <https://etiennelebel.com/cs/t-leaderboard/t-leaderboard.html> (last visited: August 12, 2021)

Deutsche Forschungsgemeinschaft. (2019). Guidelines for Safeguarding Good Research Practice. Code of Conduct. <https://doi.org/10.5281/zenodo.3923602>

DORA: San Francisco Declaration of Research Assessment (2013). <https://sfedora.org/>

Elo, S., Kyngäs, H. (2008). The qualitative content analysis process. *Journal of Advanced Nursing*, 62(1), 107–115. <https://doi.org/10.1111/j.1365-2648.2007.04569>.

European Union (2021). Open science monitor. [https://ec.europa.eu/info/research-and-innovation/strategy/strategy-2020-2024/our-digital-future/open-science/open-science-monitor\\_en](https://ec.europa.eu/info/research-and-innovation/strategy/strategy-2020-2024/our-digital-future/open-science/open-science-monitor_en) (last visited: August 12, 2021).

Goldacre B, DeVito N J, Heneghan C, Irving F, Bacon S, Fleminger J et al. (2018). Compliance with requirement to report results on the EU Clinical Trials Register: cohort study and web resource. *BMJ*, 362 :k3218. doi:10.1136/bmj.k3218

European Commission (2012). Commission Guideline — Guidance on posting and publication of result-related information on clinical trials in relation to the implementation of Article 57(2) of Regulation (EC) No 726/2004 and Article 41(2) of Regulation (EC) No 1901/2006. *Official Journal of the European Union*, C 302, 6.10.212.

Flier, J. (2017). Faculty promotion must assess reproducibility. *Nature*, 549(7671), 133–133. <https://doi.org/10.1038/549133a>

Forsberg, E. M., Anthun, F. O., Bailey, S., Birchley, G., Bout, H., Casonato, C., et al. (2018). Working with research integrity—Guidance for research performing organizations: The Bonn PRINTIGER statement. *Science and Engineering Ethics*, 24, 1023–1034

Fusch, P. I., Ness, L. (2015). Are We There Yet? Data Saturation in Qualitative Research. *The Qualitative Report*, 20, 1408–1416.

Jeangirard, E. (2019). Monitoring Open Access at a national level: French case study. *ELPUB 2019 23rd edition of the International Conference on Electronic Publishing*, Jun 2019, Marseille, France. 10.4000/proceedings.elpub.2019.20 . hal-02141819

Hicks, D., Wouters, P., Waltman, L., de Rijcke, S., & Rafols, I. (2015). Bibliometrics: The Leiden Manifesto for research metrics. *Nature*, 520, 429–431. <https://doi.org/10.1038/520429a>

Higgins JP, Altman DG, Gotzsche PC, Juni P, Moher D, Oxman AD, Savovic J, Schulz KF, Weeks L, Sterne JA (2011). Cochrane Bias Methods Group; Cochrane Statistical Methods Group: The Cochrane Collaboration's tool for assessing risk of bias in randomised trials. *BMJ*. 343: d5928-10.1136/bmj.d5928.

Higginson, A. D. & Munafò, M. R. (2016). Current Incentives for Scientists Lead to Underpowered Studies with Erroneous Conclusions. *PLOS Biol.* 14, e2000995.

Ioannidis JPA (2014) How to Make More Published Research True. *PLOS Medicine* 11(10): e1001747. <https://doi.org/10.1371/journal.pmed.1001747>

Kilkenny, C., Browne, W., Cuthill, I. C., Emerson, M., Altman, D. G., & NC3Rs Reporting Guidelines Working Group. (2010). Animal research: reporting in vivo experiments: the arrive guidelines. *British Journal of Pharmacology*, 160(7), 1577–9. <https://doi.org/10.1111/j.1476-5381.2010.00872.x>

Macleod, M. R., Michie, S., Roberts, I., Dirnagl, U., Chalmers, I., Ioannidis, J. P. A., Salaman, R. A.-S., Chan, A.-W., & Glasziou, P. (2014). Biomedical research: Increasing value, reducing waste. *The Lancet*, 383(9912), 101–104. [https://doi.org/10.1016/S0140-6736\(13\)62329-6](https://doi.org/10.1016/S0140-6736(13)62329-6)

Macleod, M., & Mohan, S. (2019). Reproducibility and rigor in animal-based research. *ILAR Journal*. <https://doi.org/10.1093/ilar/ilz015>

Moher, D., Naudet, F., Cristea, I. A., Miedema, F., Ioannidis, J. P. A., & Goodman, S. N. (2018). Assessing scientists for hiring, promotion, and tenure. *PLoS Biology*, 16, e2004089.

Moher, D., Bouter, L., Kleinert, S., Glasziou, P., Sham, M. H., Barbour, V., Coriat, A.-M., Foeger, N., & Dirnagl, U. (2020). The Hong Kong Principles for assessing researchers: Fostering research integrity. *PLOS Biology*, 18(7), e3000737. <https://doi.org/10.1371/journal.pbio.3000737>

Moher D, Bouter L, Foeger N, Dirnagl U (2021) Incorporating equity, diversity, and inclusiveness into the Hong Kong Principles. *PLOS Biology* 19(4): e3001140. <https://doi.org/10.1371/journal.pbio.3001140>

Nosek, B., G. C. Banks, D. Borsboom, S. D. Bowman, S. J. Breckler, S. Buck, and C. D.



Chambers, et al. (2015). Promoting an Open Research Culture. *Science* 348 (6242): 1422-1425. doi: 10.1126/science.aab2374.

Rice, D. B., Raffoul, H., Ioannidis, J. P. A. & Moher, D. (2020). Academic criteria for promotion and tenure in biomedical sciences faculties: cross sectional analysis of international sample of universities. *BMJ* m2081. doi:10.1136/bmj.m2081

Serghiou S, Contopoulos-Ioannidis DG, Boyack KW, Riedel N, Wallach JD, Ioannidis JPA. (2021). Assessment of transparency indicators across the biomedical literature: How open is open? *PLoS Biol* 19(3): e3001107.

Strech, D., Weissgerber, T., & Dirnagl, U. (2020). Improving the trustworthiness, usefulness, and ethics of biomedical research through an innovative and comprehensive institutional initiative. *PLOS Biology*, 18(2), e3000576. <https://doi.org/10.1371/journal.pbio.3000576>

Tong, A., Sainsbury, P., & Craig, J. (2007). Consolidated criteria for reporting qualitative research (COREQ): A 32-item checklist for interviews and focus groups. *International Journal for Quality in Health Care: Journal of the International Society for Quality in Health Care*, 19(6), 349–357. <https://doi.org/10.1093/intqhc/mzm042>

Draft text of the UNESCO Recommendation on Open Science  
Conference: Intergovernmental Meeting of Experts (Category II) Related to a Draft UNESCO Recommendation on Open Science, online, 2021  
<https://unesdoc.unesco.org/ark:/48223/pf0000376893?posInSet=7&queryId=64f6c09b-9508-4258-82a1-e195d9d38368> (last accessed: August 12, 2021).

Wieschowski, S., Riedel, N., Wollmann, K., Kahrass, H., Müller-Ohraun Stephanie, Schürmann Christopher, Kelley, S., Kszuk, U., Siegerink, B., Dirnagl, U., Meerpohl Jörg, & Strech, D. (2019). Result dissemination from clinical trials conducted at german university medical centers was delayed and incomplete. *Journal of Clinical Epidemiology*, 115, 37–45. <https://doi.org/10.1016/j.jclinepi.2019.06.002>

World Health Organization. 2015. WHO statement on public disclosure of clinical trial results. Available at <https://www.who.int/news/item/09-04-2015-japan-primary-registries-network>. Accessed July 27<sup>th</sup>, 2021.

World Health Organization. 2017. Joint statement on public disclosure of results from clinical trials. Available at <https://www.who.int/news/item/18-05-2017-joint-statement-on-registration>. Accessed August 30<sup>th</sup>, 2021.

## Appendices

1. Communication to interview participants (i.e., invitational e-mail, information letter, informed consent, further correspondence)
2. Proof-of-principle dashboard in pictures and tutorial:  
<https://www.youtube.com/watch?v=VDdljq5zI9E>
3. Topic guide
4. Code tree

It is made available under a [CC-BY 4.0 International license](#) .
